# Supplementary material
Source: publisher figshare collection journal article supplement (https://diabetesjournals.figshare.com/articles/dataset/_/19538869)
Supplement: Supplementary file 3 [file 1]

## **Supplemental Material**

### **Risk Factors (Expanded)**

Traditionally, the risk factors for HF in both T2D and T1D include diabetes duration, poor glycemic control, uncontrolled hypertension, hyperlipidemia, higher BMI, microalbuminuria, renal dysfunction, ischemic heart disease, and peripheral artery disease (1–3). Current trends suggest control of risk factors is poor in those with diabetes (4), emphasizing importance of careful review for each during clinical visits.

### *Role of Obesity*

Obesity exerts similar adverse effects on the risk of incident HF among individuals with T2D and prediabetes (2,5–7). In several large population-based studies, BMI significantly predicted incident HF among patients with T2D, T1D, and prediabetes (2,5,7).

### *Role of Hypertension*

The risk of HF development is exaggerated with the (common) coexistence of diabetes and hypertension (8) and the frequent combination of poorly controlled hypertension and diabetes is particularly problematic with respect to HF risk. For example, in the UKPDS cohort, risk of incident HF increased by 12% for every 10 mmHg above systolic BP 130 mmHg (9). A meta-analysis including 193,424 individuals with hypertension showed that those with diabetes had a fourfold increased risk of HF development compared with those without diabetes (10), while participants with T2D and hypertension in the Strong Heart Study (11) had a 2.6 higher 12-year risk of HF than those with normal fasting glucose. Conversely, optimal BP control was shown to decrease risk of new HF by ~50% (12).

### *Role of Hyperlipidemia*

Due to genetic factors, excess weight, and insulin resistance, individuals with T2D have a wide spectrum of lipid abnormalities such as increased small dense LDL particles, elevated plasma triglycerides, and decreased HDL cholesterol, all contributing to accelerated atherosclerosis and increased cardiovascular risk (13). In contrast, individuals with T1D with optimal glucose control have normal or slightly decreased plasma LDL cholesterol and triglycerides, and their plasma HDL cholesterol levels are normal or elevated. Despite normal or even increased levels of HDL cholesterol in T1D, the CVD and HF risks are considerable. This paradox could suggest a potential role of functional abnormalities of HDL particles in individuals with T1D (14) (Supplementary Fig. 1).

Hypercholesterolemia is associated with increased risk for the development of HF (15), and lipid-modifying therapy trials have demonstrated that treatment with statins decreases incidence of HF (16). Although large epidemiological studies such as MESA (17) or the Physicians' Health Study (18) failed to show that specific dyslipidemia such as high triglyceride or low HDL cholesterol levels were significant predictors of incident HF in the general population, the risk of incident HF was greater in individuals with diabetes who also had high triglyceride or low HDL cholesterol levels or high total cholesterol-to-HDL cholesterol ratio (19).

### *DKD*

Kidney disease and diabetes are both major and independent risk factors for the development of HF; thus, individuals with DKD are at especially high risk (20). Such individuals not only are more likely to have coronary artery disease and hypertension but also are more likely to have diabetic cardiomyopathy (20). Accordingly, early recognition and management in these individuals are crucial.

Among individuals with DKD, both albuminuria and the level of estimated glomerular filtration rate (eGFR) are predictors of HF in those without HF, as shown in several large longitudinal DKD cohorts (21,22). Individuals with T2D with eGFR 45–60 mL/min/1.73 m<sup>2</sup> have ~25–35% increased risk for HF hospitalization, and this risk increases by 2.0–2.5 times in individuals with eGFR <30 mL/min/1.73 m<sup>2</sup> (23).

In individuals with T1D, the risk of HF hospitalization is double at eGFR 45–60 mL/min/1.73 m<sup>2</sup>, and more than triple at eGFR <30 mL/min/1.73 m<sup>2</sup>, compared with that associated with normal eGFR (24). Moreover, the risk of cardiorenal disease (HF and DKD) may be higher, 1.4- to 3.0-fold, in adults with T1D across various ages compared with adults with T2D (25).

### *CAD*

CAD is a major risk factor for and a common cause of HF in all individuals with diabetes and it is often premature, diffuse, severe, and silent (26–28). In addition, individuals with diabetes and CAD have worse outcomes after acute myocardial infarction (26,29,30). Recently reported evidence from >70,000 individuals admitted with acute myocardial infarction included in the Swedish Web-System for Enhancement and Development of Evidence-Based Care in Heart Disease Evaluated According to Recommended Therapies (SWEDEHEART) registry shows that HF risk was twice as high among those with diabetes during a mean follow-up of ~3 years compared with individuals without diabetes (31).

### *Sex Differences*

In the Framingham Heart Study, incident HF risk was twofold higher in men and fivefold higher in women with diabetes compared with the respective general population (32). Several more recent large cohort studies subsequently confirmed that women with diabetes have higher

risks of incident HF and hospitalization for HF (1,33) than men with diabetes. In a global meta-analysis of >12 million individuals to examine sex differences in the excess risk of HF associated with diabetes (34), women with T1D and T2D demonstrated a respective 47% and 9% excess risk of HF compared with men with the same diabetes types.

CAD is a major cause of HF in people with T2D, and the excess CAD risk associated with diabetes is greater in women compared with men irrespective of age (35). Evidence highlights that women with diabetes may have overall poorer control for several established cardiovascular risk factors (e.g., blood glucose, blood pressure, cholesterol, and smoking status) than men with diabetes (36). Although it is not yet established whether these discrepancies are due to undertreatment, poorer access to health care, or some other cause (36), recently reported data indicated that women with diabetes are less likely to receive cardioprotective medications such as statins and ACE inhibitors compared with men (37).

### *SDOH*

SDOH affect development and progression of HF (38,39). In both T1D and T2D, low income and low educational attainment increase morbidity and worsen outcomes and mortality risk irrespective of health care access and have a negative impact on health outcomes in individuals with HF (40) through barriers to accessing health insurance, medications, and high-quality foods and maintaining timely follow-up for long-term care. Food insecurity, often viewed as a surrogate marker of low socioeconomic status, poverty, and increased health risk, may represent a major risk factor for increased prevalence of cardiometabolic disorders including HF (41), as it has the potential to propagate a cycle of poor metabolic control, which then precipitates heart disease and HF. People with diabetes who live in insecure or poor housing conditions may

experience up to 70% higher rates of myocardial infarction, stroke, and HF (42) and have increased emergency room visits and hospital admission (43,44).

Although the inequity regarding both CVD and diabetes among the U.S. population has recently been highlighted (42), better understanding of race-specific risk factors for those with diabetes and HF is needed.

#### *Key Points*

- Nonglycemic risk factors amplify risk for HF in those with diabetes.
- Individuals with DKD are at especially high risk of developing HF.
- The increase in risk of HF is greater for women with diabetes than for men in comparisons with individuals without diabetes.
- Women with diabetes may have overall poorer control for the traditional cardiovascular risk factors, potentially further increasing HF risk.
- SDOH play an important role in HF risk.

**Supplementary Figure 1**—Pathophysiology of HF in diabetes. AGEs, advanced glycemc end products; ER, endoplasmic reticulum; FA, fatty acid, CA, calcium.

**Supplementary Figure 2**—Components of cardiac rehabilitation. Adapted with permission from Winnige et al. (45).

**Supplementary Table 1—Prevalence and incidence of HF among individuals with prediabetes and diabetes**

| Cohort                                                                                                    | Population studied                                                     | Duration of follow-up | Findings                                                                                                                                                                                                |
|-----------------------------------------------------------------------------------------------------------|------------------------------------------------------------------------|-----------------------|---------------------------------------------------------------------------------------------------------------------------------------------------------------------------------------------------------|
| Framingham Heart Study (32)                                                                               | 5,209 individuals age 30–62 years, no HF at baseline                   | 18 years              | <u>Incident HF</u> : RR vs. no diabetes<br>1.82 for men with diabetes<br>3.75 for women with diabetes                                                                                                   |
| NHANES I Epidemiologic Follow-up Study (46)                                                               | 13,643 individuals, no HF at baseline                                  | 19 years              | <u>Incident HF</u> : RR vs. no diabetes<br>1.85 (95% CI 1.51–2.28)                                                                                                                                      |
| Reykjavik Study (5)                                                                                       | 19,381 individuals, age 33–84 years                                    | 30 years              | a) <u>Prevalent HF rates</u> :<br>11.8 % in diabetes,<br>6.0% in IGT<br>3.2% in no diabetes.<br>b) <u>HF and diabetes</u> , age-adjusted OR<br>2.8 (95% CI 1.9–4.1) for women,<br>2.7 (1.9–3.9) for men |
| Cardiovascular disease research using Linked Bespoke studies and Electronic health Records (CALIBER) (47) | 1,921,260 individuals, 1.8% with T2D age ≥30 years; no CVD at baseline | 5.5 years*            | <u>Incident HF</u> : HR vs. no diabetes<br>1.56 (95% CI 1.45–1.69);                                                                                                                                     |
| Scottish diabetes mellitus register (33)                                                                  | 3,066,253 individuals with no diabetes,                                | 3 years               | <u>Incident HF</u> :<br>No diabetes, 2.4/1,000 person-years;<br>T2D, 12.4/1,000 person-years;                                                                                                           |

|                                                 |                                                                                                  |                                                                 |                                                                                                                                                                                                                         |
|-------------------------------------------------|--------------------------------------------------------------------------------------------------|-----------------------------------------------------------------|-------------------------------------------------------------------------------------------------------------------------------------------------------------------------------------------------------------------------|
| Saskatchewan Health databases (48)              | 136,042 T2D individuals<br>18,240 T1D individuals<br>12,272 individuals with recent-onset T2D    | 5.2 years                                                       | T1D, 5.6 /1,000 person-years<br>Incident HF: rate ratio vs. no diabetes<br>2.9 (95% CI 2.6–3.2)                                                                                                                         |
| Kaiser Permanente Northwest (6)                 | 8,231 T2D individuals<br>8,845 age-sex-matched s<br>no diabetes individual;<br>no HF at baseline | 6 years                                                         | Incident HF: rate ratio vs. no diabetes<br>2.5 (95% CI 2.3–2.7)                                                                                                                                                         |
| Kaiser Permanente Georgia (49)                  | 359,947 individuals<br>no HF at baseline                                                         | 1,015,794<br>person-years                                       | Incident HF diabetes vs no diabetes :<br>Women HR 2.03 (95% CI 1.84–2.37)<br>Men HR 1.71 (1.55–1.89)                                                                                                                    |
| Taiwan's National Health Insurance system (50)  | 34,291 T2D participants<br>34,291 age- and sex-<br>matched no diabetes;<br>no HF at baseline     | 7.79 years                                                      | Incident HF vs. no diabetes:<br>HR 1.47 (95% CI 1.40–1.54)                                                                                                                                                              |
| Swedish National Diabetes Registry Cohort 1 (2) | 20,985 T1D individuals<br>no HF at baseline                                                      | 9.0 years*                                                      | Incident HF (95% CI):<br>3.38/1,000 person-years (3.12–3.65)                                                                                                                                                            |
| Swedish National Diabetes Registry Cohort 2 (1) | 33,402 T1D individuals<br>166,228 age-, sex-, and<br>county-matched control<br>subjects          | 7.9 years for<br>T1D cohort,<br>8.3 years for<br>control cohort | <u>Rates of HF hospitalization</u> (95% CI)<br>no diabetes: 0.97/1,000 person-years<br>(0.91–1.02);<br>T1D: 4.00/1,000 person-years (3.77–4.25)<br><u>Incident HF</u> : HR vs. no diabetes (95% CI)<br>4.69 (3.64–6.04) |
| ARIC study                                      | 11,057 individuals with<br>no diabetes at baseline                                               | 14 years                                                        | Incident HF: HR (95% CI)<br>HbA <sub>1c</sub> 6.0–6.4%: 1.40 (1.09–1.79),<br>HbA <sub>1c</sub> 5.5–6.0%: 1.16 (0.98–1.37).<br>Comparator: HbA <sub>1c</sub> 5.0–5.4%                                                    |

\*Median duration. HF, heart failure; HR, hazard ratio; OR, odds ratio; T1D, type 1 diabetes; T2D, type 2 diabetes.

**Supplementary Table 2—Prevalence and incidence of diabetes among individuals with HF in population-based analyses and clinical trials**

| Cohort                           | Population studied                                                   | Duration of follow-up | Findings                                                                                |
|----------------------------------|----------------------------------------------------------------------|-----------------------|-----------------------------------------------------------------------------------------|
| Cardiovascular Health Study (51) | 3,748 elderly individuals (age ≥65 years)<br>no diabetes at baseline | 3–4 years             | <u>Incident diabetes</u> : among those with history of HF<br>OR 2.43 (95% CI 1.38–4.29) |

|                                                                                                             |                                                                     |                    |                                                     |
|-------------------------------------------------------------------------------------------------------------|---------------------------------------------------------------------|--------------------|-----------------------------------------------------|
| Studies Of Left Ventricular Dysfunction (SOLVD) (52)                                                        | 291 individuals<br>reduced LV function<br>no diabetes at baseline   | 2.9 ± 1.0<br>years | Incident diabetes:<br>47 cases/1,000 person-years   |
| Candesartan in <i>Heart Failure—Assessment of Reduction in Mortality and Morbidity Program (CHARM)</i> (53) | 5,436 individuals<br>reduced LVEF (≤40%)<br>no diabetes at baseline | 2–4 years          | Incident diabetes:<br>28 cases / 1,000 person-years |
| Eplerenone in Mild Patients Hospitalization and Survival Study in Heart Failure (EMPHASIS-HF) (54)          | 1,846 individuals<br>mild systolic HF<br>no diabetes at baseline    |                    | Incident diabetes:<br>21 cases/1,000 person-years   |
| Carvedilol Or Metoprolol European Trial (COMET) (55)                                                        | 2,298 individuals<br>chronic HF<br>no diabetes at baseline          | 5 years            | Incident diabetes:<br>20 cases/1,000 person-years   |
| PARADIGM-HF (56)                                                                                            | 8,442 individuals<br>class II, III, or IV HF<br>reduced EF (≤40%)   | 27 months*         | Incident diabetes:<br>13 cases /1,000 person-years  |

EF, ejection fraction; HF, heart failure; LV, left ventricle; OR, odds ratio. \*Median.

**Supplementary Table 3—Lifestyle/nutrition therapies for people with diabetes and HF**

| Type of intervention   | Consensus recommendations                                                                                                                                                                                                                                                                                                                                                                                                                                                                                                                                                                                                                         | Notes                                                                                                                                                                                                                                                                                                                                             |
|------------------------|---------------------------------------------------------------------------------------------------------------------------------------------------------------------------------------------------------------------------------------------------------------------------------------------------------------------------------------------------------------------------------------------------------------------------------------------------------------------------------------------------------------------------------------------------------------------------------------------------------------------------------------------------|---------------------------------------------------------------------------------------------------------------------------------------------------------------------------------------------------------------------------------------------------------------------------------------------------------------------------------------------------|
| Physical activity      | <ul style="list-style-type: none"> <li>• Regular structured exercise should be discussed.</li> <li>• Individualize the exercise training for each person, with a targeted tailored plan based on risk stratification, clinical assessment, and cardiopulmonary exercise testing before initiation of exercise training for people with diabetes and HF (57).</li> <li>• Those more deconditioned individuals will need to start at a lower training intensity and with shorter sessions.</li> <li>• In general, a combination of aerobic exercise and resistance training protocols is recommended, preferably throughout entire life.</li> </ul> | <ul style="list-style-type: none"> <li>• Shown to improve exercise capacity, symptoms, and quality of life for people with HF.</li> <li>• Recognize that not all individuals will be able to participate in a structured exercise training program; care providers should identify barriers and facilitators to best support patients.</li> </ul> |
| Cardiac rehabilitation | <ul style="list-style-type: none"> <li>• Programs include tailored combination of exercise, education on cardiovascular risk factors, psychological support, lifestyle modification, and medical care (with focus on medications with secondary cardiovascular prevention benefits).</li> </ul>                                                                                                                                                                                                                                                                                                                                                   | <ul style="list-style-type: none"> <li>• People with diabetes are significantly less likely to be referred for cardiac rehabilitation (59).</li> </ul>                                                                                                                                                                                            |



|                 |                                                                                                                                                                                                                                                                                                                                                                                                                                                                                                                                                                                                                                                                                                                                                                                  |                                                                                                                                                                                                                                                                                                                      |
|-----------------|----------------------------------------------------------------------------------------------------------------------------------------------------------------------------------------------------------------------------------------------------------------------------------------------------------------------------------------------------------------------------------------------------------------------------------------------------------------------------------------------------------------------------------------------------------------------------------------------------------------------------------------------------------------------------------------------------------------------------------------------------------------------------------|----------------------------------------------------------------------------------------------------------------------------------------------------------------------------------------------------------------------------------------------------------------------------------------------------------------------|
|                 | <ul style="list-style-type: none"> <li>• Cardiac rehabilitation is most effective in persons with HF with reduced ejection fraction and diabetes (58)</li> <li>• Referring eligible individuals with diabetes and HF to cardiac rehabilitation should be a high priority.</li> <li>• Home-based cardiac rehabilitation may be an alternative for selected clinical stable low-to moderate risk individuals</li> </ul>                                                                                                                                                                                                                                                                                                                                                            |                                                                                                                                                                                                                                                                                                                      |
| Serum potassium | <ul style="list-style-type: none"> <li>• Clinical monitoring of potassium levels in people with diabetes should be part of management plans</li> <li>• Serum potassium should be assessed within 2 to 3 days and again at 7 days. The schedule for subsequent monitoring should be dictated by the clinical stability of renal function and volume status but should occur at least monthly for the first 3 months and every 3 months thereafter</li> <li>• People should be educated to avoid over-the-counter potassium supplements and potassium-based salt substitutes</li> <li>• Limited intake of high-potassium food and beverages</li> <li>• Avoidance of medications that may increase risk for hyperkalemia (such as nonsteroidal anti-inflammatory drugs).</li> </ul> | <ul style="list-style-type: none"> <li>• People with diabetes are at increased risk of developing hyperkalemia in the setting of RAAS blockade including the combination of ARB and neprilysin inhibitors (60,61).</li> <li>• Serum potassium levels were shown to independently predict mortality in HF.</li> </ul> |
| Smoking         | <ul style="list-style-type: none"> <li>• Smoking cessation counseling</li> <li>• Appropriate referrals for smoking support</li> </ul>                                                                                                                                                                                                                                                                                                                                                                                                                                                                                                                                                                                                                                            |                                                                                                                                                                                                                                                                                                                      |
| Dietary salt    | <ul style="list-style-type: none"> <li>• In general, lowering sodium intake (to &lt;2300 mg/d or even lower, to &lt;1500 mg/d) (3,62)</li> <li>• The DASH diet, the ADA recommendations for medical nutrition therapy, and the AHA/ACC lifestyle management guidelines can all be used to guide dietary sodium recommendations.</li> </ul>                                                                                                                                                                                                                                                                                                                                                                                                                                       | <ul style="list-style-type: none"> <li>• The optimal quantity of salt in the diet is still a subject of debate. The amount should be adapted to the clinical situation, the severity of symptoms, and baseline consumption without interfering with other nutritional content.</li> </ul>                            |
| Fluid intake    | <ul style="list-style-type: none"> <li>• Restriction of daily fluid intake to approximately 2 L/d should be considered for people with fluid retention or congestion that is not easily controlled with diuretics (3,62,63)</li> <li>• Severely limiting daily fluid intake to &lt; 1.5 L might have adverse consequences on nutrition, renal function, and quality of life without known additional benefit and should be applied selectively.</li> <li>• Special consideration for person with hyponatremia should be applied</li> </ul>                                                                                                                                                                                                                                       | <ul style="list-style-type: none"> <li>• The appropriate quantity of fluid intake is a subject of debate. Strict limits should be imposed when there is clear fluid overload or demonstrated sensitivity to fluid intake.</li> </ul>                                                                                 |
| Alcohol         | <ul style="list-style-type: none"> <li>• Minimize alcohol intake</li> <li>• Promote person education regarding management strategies of hypoglycemia and hypoglycemia unawareness.</li> </ul>                                                                                                                                                                                                                                                                                                                                                                                                                                                                                                                                                                                    | <ul style="list-style-type: none"> <li>• Alcohol intake in individuals with diabetes can increase the risk for delayed hypoglycemia and blunt hypoglycemia awareness.</li> </ul>                                                                                                                                     |

|                         |                                                                                                                                                                                                                                                                                                                                                                                                                                                                                                                                                                                                                                                                                                                                                                                                                                                                                                                                                                                                                                                                                                                  |                                                                                                                                                                                                                     |
|-------------------------|------------------------------------------------------------------------------------------------------------------------------------------------------------------------------------------------------------------------------------------------------------------------------------------------------------------------------------------------------------------------------------------------------------------------------------------------------------------------------------------------------------------------------------------------------------------------------------------------------------------------------------------------------------------------------------------------------------------------------------------------------------------------------------------------------------------------------------------------------------------------------------------------------------------------------------------------------------------------------------------------------------------------------------------------------------------------------------------------------------------|---------------------------------------------------------------------------------------------------------------------------------------------------------------------------------------------------------------------|
| Dietary recommendations | <ul style="list-style-type: none"> <li>• Should be individually tailored according to caloric requirements, personal and cultural food preferences, prescribed medications, presence of overweight /obesity and comorbid medical conditions</li> <li>• Decrease of energy density: &lt; 125 kcal/100 g of consumed food is recommended compared to the average values &gt; 160 kcal/100 g in the USA and UK populations.</li> <li>• Reducing the intake of saturated fat (to 5% to 6% of total calories)</li> <li>Eliminating trans fat</li> <li>• Increased intake of dietary fiber</li> <li>• A Mediterranean-style diet high in MUFA is a recommended alternative to consuming a high-carb low-fat diet</li> <li>• Dietary patterns that focus on the intake of vegetables, moderate amounts of fruit and whole grains, poultry, fish, low-fat dairy, legumes, nontropical vegetable oils and nuts.</li> <li>• Intake of sweets, sugar-sweetened beverages and red meats should be limited</li> <li>• DASH diet (vegetables, fruits, whole gains, low fat milk products, nuts, fish, lean poultry)</li> </ul> | <ul style="list-style-type: none"> <li>• The ADA recommendations for medical nutrition therapy and the AHA/ACC lifestyle management guidelines can all be used to guide dietary recommendations (64,65).</li> </ul> |
|-------------------------|------------------------------------------------------------------------------------------------------------------------------------------------------------------------------------------------------------------------------------------------------------------------------------------------------------------------------------------------------------------------------------------------------------------------------------------------------------------------------------------------------------------------------------------------------------------------------------------------------------------------------------------------------------------------------------------------------------------------------------------------------------------------------------------------------------------------------------------------------------------------------------------------------------------------------------------------------------------------------------------------------------------------------------------------------------------------------------------------------------------|---------------------------------------------------------------------------------------------------------------------------------------------------------------------------------------------------------------------|

**Supplementary Table 4—Pharmacological treatment for managing hyperglycemia in individuals with diabetes and HF (66–68)**

| Type of intervention | Consensus recommendations                                                                                                                                                                                                                                                                                                                                                                                                                                                                                                                                                                                                                                                                                                                                                                                                                                                                                                                                           | Notes                                                                                                                                                                                                                                                                                                                                                                                                                                                                                                                               |
|----------------------|---------------------------------------------------------------------------------------------------------------------------------------------------------------------------------------------------------------------------------------------------------------------------------------------------------------------------------------------------------------------------------------------------------------------------------------------------------------------------------------------------------------------------------------------------------------------------------------------------------------------------------------------------------------------------------------------------------------------------------------------------------------------------------------------------------------------------------------------------------------------------------------------------------------------------------------------------------------------|-------------------------------------------------------------------------------------------------------------------------------------------------------------------------------------------------------------------------------------------------------------------------------------------------------------------------------------------------------------------------------------------------------------------------------------------------------------------------------------------------------------------------------------|
| <b>SGLT2i</b>        | <ul style="list-style-type: none"> <li>• Empagliflozin, canagliflozin, and dapagliflozin decreased risk of HF hospitalizations and major CVD outcomes in large randomized trials of individuals with T2D and either established ASCVD or high ASCVD risk (69–72).</li> <li>• Dapagliflozin and empagliflozin have been found to decrease risk of CV death and worsening HF in individuals with HFrEF and are recommended treatments for people with HFrEF with or without diabetes.</li> <li>• Canagliflozin and dapagliflozin are recommended for people with T2D and established CKD with albuminuria (UACR <math>\geq 200</math> mg/g).</li> <li>• Additional data suggest a benefit to SGLT2i therapy in individuals with both HFpEF and HF, and in CKD without significant albuminuria (69–72).</li> <li>• SGLT2i are therefore recommended for individuals with T2D and high ASCVD risk, HF, or CKD irrespective of the need for glucose lowering.</li> </ul> | <ul style="list-style-type: none"> <li>• Mechanisms for cardiorenal benefits include: increased natriuresis with associated decrease in plasma volume and cardiac preload, lower systolic blood pressure, decreased aortic stiffness, weight loss, and reductions in oxidative stress, advanced glycation end products, and inflammation.</li> <li>• Use of SGLT2i may increase risk of urinary and genital infections and dehydration and should not be initiated if people are following a very-low-carbohydrate diet.</li> </ul> |

|                         |                                                                                                                                                                                                                                                                                                                                                                                                                                                                                                                                                                                                                                                      |                                                                                                                                                                                                                                                                                                                                                                                                                                                                                                             |
|-------------------------|------------------------------------------------------------------------------------------------------------------------------------------------------------------------------------------------------------------------------------------------------------------------------------------------------------------------------------------------------------------------------------------------------------------------------------------------------------------------------------------------------------------------------------------------------------------------------------------------------------------------------------------------------|-------------------------------------------------------------------------------------------------------------------------------------------------------------------------------------------------------------------------------------------------------------------------------------------------------------------------------------------------------------------------------------------------------------------------------------------------------------------------------------------------------------|
|                         | <ul style="list-style-type: none"> <li>• For people with diabetes and stage B HF, SGLT2i should be started as early as possible, while for those with HF stage C and higher SGLT2i are an expected element of care.</li> </ul>                                                                                                                                                                                                                                                                                                                                                                                                                       |                                                                                                                                                                                                                                                                                                                                                                                                                                                                                                             |
| <b>GLP-1RA</b>          | <ul style="list-style-type: none"> <li>• Benefits of GLP-1RA in individuals with T2D and HF remain less well established in comparison with SGLT2i.</li> <li>• GLP-1RA should be considered for treating hyperglycemia in individuals with T2D at risk for or with established HF if SGLT2i are contraindicated or not tolerated, including in individuals with advanced CKD.</li> <li>• GLP-1RA may also be considered as additional therapy for such persons if adequate glycemic control is not achieved with use of an SGLT2i, as they have indirectly beneficial effects on weight, BP, and CKD with a reduced risk of hypoglycemia.</li> </ul> | <ul style="list-style-type: none"> <li>• Results from meta-analysis of smaller studies indicated that liraglutide may be associated with improvements in LVEF, LVESV, and LV filling pressure (74–76).</li> <li>• Potential cardiovascular effects are likely mediated by reduced RAAS activity, reduced oxidative stress, decreased blood pressure, improved endothelial function, and reduced triglycerides and LDL levels.</li> <li>• GLP1-RA use increases risk for GI-related side effects.</li> </ul> |
| <b>Metformin</b>        | <ul style="list-style-type: none"> <li>• If additional glycemic control is indicated beyond SGLT2i monotherapy for individuals at risk for or with established HF, use of metformin or GLP-1RA should be favored over sulfonylurea therapy.</li> <li>• In the absence of contraindications, metformin is safe and effective, with a reduced risk of hypoglycemia and weight gain (77,78).</li> </ul>                                                                                                                                                                                                                                                 | <ul style="list-style-type: none"> <li>• From recent meta-analyses including large cohorts it was reported that metformin was associated with significant reduction in all-cause hospitalization for people with HF.</li> <li>• Metformin was associated with lower risk of HF hospitalization compared with sulfonylureas including in those with reduced EF.</li> <li>• Metformin may increase risk for GI side effects.</li> </ul>                                                                       |
| <b>Sulfonylureas</b>    | <ul style="list-style-type: none"> <li>• Use of sulfonylureas should be judiciously considered in those situations when therapies with proven benefit for HF are not available (78).</li> </ul>                                                                                                                                                                                                                                                                                                                                                                                                                                                      | <ul style="list-style-type: none"> <li>• Sulfonylurea use may increase risk of severe and recurrent hypoglycemia and weight gain.</li> </ul>                                                                                                                                                                                                                                                                                                                                                                |
| <b>Insulin</b>          | <ul style="list-style-type: none"> <li>• If insulin is needed for management of hyperglycemia, it should be used judiciously to prevent hypoglycemia, weight gain, and other adverse events (79).</li> </ul>                                                                                                                                                                                                                                                                                                                                                                                                                                         | <ul style="list-style-type: none"> <li>• Insulin use may increase risk of severe hypoglycemia and weight gain.</li> </ul>                                                                                                                                                                                                                                                                                                                                                                                   |
| <b>DPP-4 inhibitors</b> | <ul style="list-style-type: none"> <li>• DPP-4 inhibitors are not recommended for people with T2D with stage B, C,D HF.</li> </ul>                                                                                                                                                                                                                                                                                                                                                                                                                                                                                                                   |                                                                                                                                                                                                                                                                                                                                                                                                                                                                                                             |
| <b>TZDs</b>             | <ul style="list-style-type: none"> <li>• TZDs are not recommended for use in individuals with stage B HF and are contraindicated for those with stage C or D.</li> </ul>                                                                                                                                                                                                                                                                                                                                                                                                                                                                             | <ul style="list-style-type: none"> <li>• TZDs increase risk of fluid retention and weight gain.</li> </ul>                                                                                                                                                                                                                                                                                                                                                                                                  |

CV, cardiovascular; EF, ejection fraction; GI, gastrointestinal; LVESV, left ventricular end-systolic volume; LV, left ventricular; UACR, urine albumin-to-creatinine ratio.

## References

1. Rosengren A, Vestberg D, Svensson A-M, et al. Long-term excess risk of heart failure in people with type 1 diabetes: a prospective case-control study. *Lancet Diabetes Endocrinol* 2015; 3:876–885
2. Lind M, Bounias I, Olsson M, Gudbjörnsdottir S, Svensson A-M, Rosengren A. Glycaemic control and incidence of heart failure in 20,985 patients with type 1 diabetes: an observational study. *Lancet* 2011;378:140–146
3. Dunlay SM, Givertz MM, Aguilar D, et al. Type 2 diabetes mellitus and heart failure: a scientific statement from the American Heart Association and the Heart Failure Society of America: this statement does not represent an update of the 2017 ACC/AHA/HFSA heart failure guideline update. *Circulation* 2019;140:e294–e324
4. Wang L, Li X, Wang Z, et al. Trends in prevalence of diabetes and control of risk factors in diabetes among US adults, 1999-2018. *JAMA* 2021;326:1–13
5. Thrainsdottir IS, Aspelund T, Thorgeirsson G, et al. The association between glucose abnormalities and heart failure in the population-based Reykjavík Study. *Diabetes Care* 2005;28:612–616
6. Nichols GA, Gullion CM, Koro CE, Ephross SA, Brown JB. The incidence of congestive heart failure in type 2 diabetes: an update. *Diabetes Care* 2004;27:1879–1884
7. Edqvist J, Rawshani A, Adiels M, et al. BMI, mortality, and cardiovascular outcomes in type 1 diabetes: findings against an obesity paradox. *Diabetes Care* 2019;42:1297–1304
8. Franjic B, Marwick TH. The diabetic, hypertensive heart: epidemiology and mechanisms of a very high-risk situation. *J Hum Hypertens* 2009;23:709–717
9. Adler AI, Stratton IM, Neil HA, et al. Association of systolic blood pressure with macrovascular and microvascular complications of type 2 diabetes (UKPDS 36): prospective observational study. *BMJ* 2000;321:412–419
10. Tocci G, Sciarretta S, Volpe M. Development of heart failure in recent hypertension trials. *J Hypertens* 2008;26:1477–1486
11. de Simone G, Devereux RB, Chinali M, et al. Diabetes and incident heart failure in hypertensive and normotensive participants of the Strong Heart Study. *J Hypertens* 2010;28:353–360
12. Moser M, Hebert PR. Prevention of disease progression, left ventricular hypertrophy and congestive heart failure in hypertension treatment trials. *J Am Coll Cardiol* 1996;27:1214–1218

13. Schofield JD, Liu Y, Rao-Balakrishna P, Malik RA, Soran H. Diabetes dyslipidemia. *Diabetes Ther* 2016;7:203–219
14. Manjunatha S, Distelmaier K, Dasari S, Carter RE, Kudva YC, Nair KS. Functional and proteomic alterations of plasma high density lipoproteins in type 1 diabetes mellitus. *Metabolism* 2016;65:1421–1431
15. Velagaleti RS, Massaro J, Vasan RS, Robins SJ, Kannel WB, Levy D. Relations of lipid concentrations to heart failure incidence: the Framingham Heart Study. *Circulation* 2009;120:2345–2351
16. Martin JH, Krum H. Statins and clinical outcomes in heart failure. *Clin Sci (Lond)* 2007;113:119–127
17. Bahrami H, Bluemke DA, Kronmal R, et al. Novel metabolic risk factors for incident heart failure and their relationship with obesity: the MESA (Multi-Ethnic Study of Atherosclerosis) study. *J Am Coll Cardiol* 2008;51:1775–1783
18. Dhingra R, Sesso HD, Kenchaiah S, Gaziano JM. Differential effects of lipids on the risk of heart failure and coronary heart disease: the Physicians' Health Study. *Am Heart J* 2008;155:869–875
19. Ebong IA, Goff DC, Rodriguez CJ, Chen H, Sibley CT, Bertoni AG. Association of lipids with incident heart failure among adults with and without diabetes mellitus: Multiethnic Study of Atherosclerosis. *Circ Heart Fail* 2013;6:371–378
20. Gilbert RE, Connelly K, Kelly DJ, Pollock CA, Krum H. Heart failure and nephropathy: catastrophic and interrelated complications of diabetes. *Clin J Am Soc Nephrol* 2006;1:193–208
21. Gerstein HC, Mann JF, Yi Q, et al. Albuminuria and risk of cardiovascular events, death, and heart failure in diabetic and nondiabetic individuals. *JAMA* 2001;286:421–426
22. Remuzzi G, Ruggenenti P, Perna A, et al. Continuum of renoprotection with losartan at all stages of type 2 diabetic nephropathy: a post hoc analysis of the RENAAL trial results. *J Am Soc Nephrol* 2004;15:3117–3125
23. Tancredi M, Rosengren A, Olsson M, et al. The relationship between three eGFR formulas and hospitalization for heart failure in 54 486 individuals with type 2 diabetes. *Diabetes Metab Res Rev* 2016;32:730–735
24. Vestberg D, Rosengren A, Olsson M, et al. Decreased eGFR as a risk factor for heart failure in 13 781 individuals with type 1 diabetes. *J Diabetes Sci Technol* 2015;10:131–136
25. Kristófi R, Bodegard J, Norhammar A, et al. Cardiovascular and renal disease burden in type 1 compared with type 2 diabetes: a two-country nationwide observational study. *Diabetes Care* 2021;44:1211–1218

26. Haffner SM, Lehto S, Rönnemaa T, Pyörälä K, Laakso M. Mortality from coronary heart disease in subjects with type 2 diabetes and in nondiabetic subjects with and without prior myocardial infarction. *N Engl J Med* 1998;339:229–234
27. Booth GL, Kapral MK, Fung K, Tu JV. Relation between age and cardiovascular disease in men and women with diabetes compared with non-diabetic people: a population-based retrospective cohort study. *Lancet* 2006;368:29–36
28. Rawshani A, Rawshani A, Franzén S, et al. Mortality and cardiovascular disease in type 1 and type 2 diabetes. *N Engl J Med* 2017;376:1407–1418
29. Aguilar D, Solomon SD, Køber L, et al. Newly diagnosed and previously known diabetes mellitus and 1-year outcomes of acute myocardial infarction: the VALsartan In Acute myocardial iNfarcTion (VALIANT) trial. *Circulation* 2004;110:1572–1578
30. Donahoe SM, Stewart GC, McCabe CH, et al. Diabetes and mortality following acute coronary syndromes. *JAMA* 2007;298:765–775
31. Ritsinger V, Nyström T, Saleh N, Lagerqvist B, Norhammar A. Heart failure is a common complication after acute myocardial infarction in patients with diabetes: a nationwide study in the SWEDEHEART registry. *Eur J Prev Cardiol* 2020;27:1890–1901
32. Kannel WB, Hjortland M, Castelli WP. Role of diabetes in congestive heart failure: the Framingham study. *Am J Cardiol* 1974;34:29–34
33. McAllister DA, Read SH, Kerssens J, et al. Incidence of hospitalisation for heart failure and case-fatality among 3.25 million people with and without diabetes. *Circulation* 2018;138:2774–2786
34. Ohkuma T, Komorita Y, Peters SAE, Woodward M. Diabetes as a risk factor for heart failure in women and men: a systematic review and meta-analysis of 47 cohorts including 12 million individuals. *Diabetologia* 2019;62:1550–1560
35. Kalyani RR, Lazo M, Ouyang P, et al. Sex differences in diabetes and risk of incident coronary artery disease in healthy young and middle-aged adults. *Diabetes Care* 2014;37:830–838
36. Fan W, Song Y, Inzucchi SE, et al. Composite cardiovascular risk factor target achievement and its predictors in US adults with diabetes: the Diabetes Collaborative Registry. *Diabetes Obes Metab* 2019;21:1121–1127
37. Butalia S, Lewin AM, Simpson SH, et al. Sex-based disparities in cardioprotective medication use in adults with diabetes. *Diabetol Metab Syndr* 2014;6:117
38. Havranek EP, Mujahid MS, Barr DA, et al. Social determinants of risk and outcomes for cardiovascular disease: a scientific statement from the American Heart Association. *Circulation* 2015;132:873–898

39. White-Williams C, Rossi LP, Bittner VA, et al. Addressing social determinants of health in the care of patients with heart failure: a scientific statement from the American Heart Association. *Circulation* 2020;141:e841–e863
40. Witte KK, Patel PA, Walker AMN, et al. Socioeconomic deprivation and mode-specific outcomes in patients with chronic heart failure. *Heart* 2018;104:993–998
41. Berkowitz SA, Berkowitz TSZ, Meigs JB, Wexler DJ. Trends in food insecurity for adults with cardiometabolic disease in the United States: 2005-2012. *PLoS One* 2017;12:e0179172
42. Hill-Briggs F, Adler NE, Berkowitz SA, et al. Social determinants of health and diabetes: a scientific review. *Diabetes Care* 2020;44:258–279
43. Baggett TP, Liauw SS, Hwang SW. Cardiovascular disease and homelessness. *J Am Coll Cardiol* 2018;71:2585–2597
44. Kushel MB, Gupta R, Gee L, Haas JS. Housing instability and food insecurity as barriers to health care among low-income Americans. *J Gen Intern Med* 2006;21:71–77
45. Winnige P, Vysoky R, Dosbaba F, Batalik L. Cardiac rehabilitation and its essential role in the secondary prevention of cardiovascular diseases. *World J Clin Cases* 2021;9:1761–1784
46. He J, Ogden LG, Bazzano LA, Vupputuri S, Loria C, Whelton PK. Risk factors for congestive heart failure in US men and women: NHANES I epidemiologic follow-up study. *Arch Intern Med* 2001;161:996–1002
47. Shah AD, Langenberg C, Rapsomaniki E, et al. Type 2 diabetes and incidence of cardiovascular diseases: a cohort study in 1·9 million people. *Lancet Diabetes Endocrinol* 2015;3:105–113
48. Leung AA, Eurich DT, Lamb DA, et al. Risk of heart failure in patients with recent-onset type 2 diabetes: population-based cohort study. *J Card Fail* 2009;15:152–157
49. Goyal A, Norton CR, Thomas TN, et al. Predictors of incident heart failure in a large insured population: a one million person-year follow-up study. *Circ Heart Fail* 2010;3:698–705
50. Chen H-F, Ho C-A, Li C-Y. Risk of heart failure in a population with type 2 diabetes versus a population without diabetes with and without coronary heart disease. *Diabetes Obes Metab* 2019;21:112–119
51. Guglin M, Lynch K, Krischer J. Heart failure as a risk factor for diabetes mellitus. *Cardiology* 2014;129:84–92
52. Vermees E, Ducharme A, Bourassa MG, et al. Enalapril reduces the incidence of diabetes in patients with chronic heart failure: insight from the Studies Of Left Ventricular Dysfunction (SOLVD). *Circulation* 2003;107:1291–1296

53. Yusuf S, Ostergren JB, Gerstein HC, et al. Effects of candesartan on the development of a new diagnosis of diabetes mellitus in patients with heart failure. *Circulation* 2005;112:48–53
54. Preiss D, van Veldhuisen DJ, Sattar N, et al. Eplerenone and new-onset diabetes in patients with mild heart failure: results from the Eplerenone in Mild Patients Hospitalization and Survival Study in Heart Failure (EMPHASIS-HF). *Eur J Heart Fail* 2012;14:909–915
55. Torp-Pedersen C, Metra M, Charlesworth A, et al. Effects of metoprolol and carvedilol on pre-existing and new onset diabetes in patients with chronic heart failure: data from the Carvedilol Or Metoprolol European Trial (COMET). *Heart* 2007;93:968–973
56. McMurray JJV, Packer M, Desai AS, et al. Angiotensin–neprilysin inhibition versus enalapril in heart failure. *N Engl J Med* 2014;371:993–1004
57. Lindgren M, Börjesson M. The importance of physical activity and cardiorespiratory fitness for patients with heart failure. *Diabetes Res Clin Pract* 2021;176:108833
58. Yancy CW, Jessup M, Bozkurt B, et al. 2013 ACCF/AHA guideline for the management of heart failure: a report of the American College of Cardiology Foundation/American Heart Association Task Force on Practice Guidelines. *J Am Coll Cardiol* 2013;62:e147–e239
59. Jiménez-Navarro MF, Lopez-Jimenez F, Pérez-Belmonte LM, et al. Benefits of cardiac rehabilitation on cardiovascular outcomes in patients with diabetes mellitus after percutaneous coronary intervention. *J Am Heart Assoc* 2017;6:e006404
60. Ponikowski P, Voors AA, Anker SD, et al. 2016 ESC guidelines for the diagnosis and treatment of acute and chronic heart failure: The Task Force for the diagnosis and treatment of acute and chronic heart failure of the European Society of Cardiology (ESC) Developed with the special contribution of the Heart Failure Association (HFA) of the ESC. *Eur Heart J* 2016;37:2129–2200
61. Núñez J, Bayés-Genís A, Zannad F, et al. Long-term potassium monitoring and dynamics in heart failure and risk of mortality. *Circulation* 2018;137:1320–1330
62. American Diabetes Association. 10. Cardiovascular disease and risk management: *Standards of Medical Care in Diabetes—2021*. *Diabetes Care* 2021;44(Suppl. 1):S125–S150
63. Ezekowitz JA, O’Meara E, McDonald MA, et al. 2017 comprehensive update of the Canadian Cardiovascular Society guidelines for the management of heart failure. *Can J Cardiol* 2017;33:1342–1433
64. American Diabetes Association. 5. Facilitating behavior change and well-being to improve health outcomes: *Standards of Medical Care in Diabetes—2021*. *Diabetes Care* 2021;44(Suppl. 1):S53–S72



65. Arnett DK, Blumenthal RS, Albert MA, et al. 2019 ACC/AHA guideline on the primary prevention of cardiovascular disease: a report of the American College of Cardiology/American Heart Association Task Force on Clinical Practice Guidelines. *Circulation* 2019;140:e596–e646
66. Zinman B, Wanner C, Lachin JM, et al. Empagliflozin, cardiovascular outcomes, and mortality in type 2 diabetes. *N Engl J Med* 2015;373:2117–2128
67. Neal B, Perkovic V, Mahaffey KW, et al. Canagliflozin and cardiovascular and renal events in type 2 diabetes. *N Engl J Med* 2017;377:644–657
68. Wiviott SD, Raz I, Bonaca MP, et al. Dapagliflozin and cardiovascular outcomes in type 2 diabetes. *N Engl J Med* 2019;380:347–357
69. McMurray JJV, Solomon SD, Inzucchi SE, et al. Dapagliflozin in patients with heart failure and reduced ejection fraction. *N Engl J Med* 2019;381:1995–2008
70. Kosiborod MN, Jhund PS, Docherty KF, et al. Effects of dapagliflozin on symptoms, function, and quality of life in patients with heart failure and reduced ejection fraction: results from the DAPA-HF trial. *Circulation* 2020 ;141:90–99
71. Anker SD, Butler J, Filippatos G, et al. Effect of empagliflozin on cardiovascular and renal outcomes in patients with heart failure by baseline diabetes status. *Circulation* 2021;143:337–349
72. Packer M, Anker SD, Butler J, et al. Cardiovascular and renal outcomes with empagliflozin in heart failure. *N Engl J Med* 2020;383:1413–1424
73. Zelniker TA, Wiviott SD, Raz I, et al. SGLT2 inhibitors for primary and secondary prevention of cardiovascular and renal outcomes in type 2 diabetes: a systematic review and meta-analysis of cardiovascular outcome trials. *Lancet* 2019;393:31–39
74. Zhang D-P, Xu L, Wang L-F, Wang H-J, Jiang F. Effects of antidiabetic drugs on left ventricular function/dysfunction: a systematic review and network meta-analysis. *Cardiovasc Diabetol* 2020;19:10
75. Ida S, Kaneko R, Imataka K, et al. Effects of oral antidiabetic drugs and glucagon-like peptide-1 receptor agonists on left ventricular diastolic function in patients with type 2 diabetes mellitus: a systematic review and network meta-analysis. *Heart Fail Rev* 2021;26:1151–1158
76. Tadic M, Sala C, Saeed S, et al. New antidiabetic therapy and HFpEF: light at the end of tunnel? *Heart Fail Rev*. 11 April 2021 [Epub ahead of print]. DOI: 10.1007/s10741-021-10106-9
77. Eurich DT, Weir DL, Majumdar SR, et al. Comparative safety and effectiveness of metformin in patients with diabetes mellitus and heart failure systematic review of observational studies involving 34 000 patients. *Circ Heart Fail* 2013;6:395–402

78. Roumie CL, Min JY, D'Agostino McGowan L, et al. Comparative safety of sulfonylurea and metformin monotherapy on the risk of heart failure: a cohort study. *J Am Heart Assoc* 2017;6
79. American Diabetes Association. 9. Pharmacologic approaches to glycemic treatment: *Standards of Medical Care in Diabetes—2021*. *Diabetes Care* 2021;44(Suppl. 1):S111–S124
